# Supplementary material for: Mechanism of replication origin melting nucleated by CMG helicase assembly
Source: PubMed Central journal article supplement (PMC9242855; doi:10.1038/s41586-022-04829-4), 2022-06-15
Supplement: 41586_2022_4829_MOESM1_ESM.pdf [file 41586_2022_4829_MOESM1_ESM.pdf]

---

**Supplementary information**

---

**Mechanism of replication origin melting  
nucleated by CMG helicase assembly**

---

In the format provided by the  
authors and unedited

## SI Guide

### **Mechanism of replication origin melting nucleated by CMG helicase assembly**

Jacob S. Lewis<sup>1</sup>, Marta H. Gross<sup>2,5</sup>, Joana Sousa<sup>1,4,5</sup>, Sarah S. Henrikus<sup>1</sup>, Julia F. Greiwe<sup>1</sup>, Andrea Nans<sup>4</sup>, John F. X. Diffley<sup>2</sup> and Alessandro Costa<sup>1,5</sup>

<sup>1</sup> Macromolecular Machines Laboratory, The Francis Crick Institute, London, U.K.

<sup>2</sup> Chromosome Replication Laboratory, The Francis Crick Institute, London, U.K.

<sup>3</sup> Structural Biology Science Technology Platform, The Francis Crick Institute, London, U.K.

<sup>4</sup> Current affiliation: UCB Pharma, Slough, U.K.

<sup>5</sup> These authors contributed equally.

## **Table of contents**

Supplementary Information

Supplementary References

Supplementary Figure 1

Supplementary Table 1

Supplementary Table 2

Supplementary Table 3

Supplementary Video 1

Supplementary Video 2

Supplementary Video 3

Supplementary Video 4

Supplementary Video 5

## Supplementary Discussion

From the end of mitosis and through G1 phase, catalytically inactive MCM double hexamers (DHs) are loaded onto duplex DNA<sup>7,8</sup>. Upon entry into S phase, the pre-initiation complex is formed, when a set of firing factors are recruited to promote the binding of GINS and Cdc45 to MCM<sup>9-11</sup>, in a process that requires Pol epsilon<sup>33</sup>. Pre-initiation complex formation depends on phosphorylation by the DDK<sup>11,13-15</sup> and CDK kinases<sup>11,12,16</sup>. Upon ADP release and ATP binding by MCM<sup>1</sup>, we find in this study, a double CMG Pol epsilon (dCMGE) complex is formed. This leads to the reconfiguration of the DH interface, with the formation of a splayed dimer that pivots around the Mcm6 N-terminal domain. In this configuration, 1.5 turns of DNA double helix are exposed between the two rings, while nucleation of DNA melting is triggered symmetrically inside each MCM central channel. Within the helicase ring, DNA melting is promoted upon ATP-triggered untwisting of 0.7 turns of the double helix<sup>1</sup>, in particular through the action of Mcm2 that pushes on the lagging strand while also pulling on the leading strand. As the minor groove is widened and DNA untwisted, Watson/Crick base pairs are broken, and three orphan bases are stabilised by an Mcm6-specific insertion of the N-terminal pore loop (Mcm6 wedge). At the same time, the DNA entrapped within the two helicase complexes remains in its original twisted configuration. Thus, the ATP-triggered structural change within the MCM motor does not promote the accumulation of torsional strain focused on the DNA found between the two helicases. This is possible because, unlike within the ATPase tier, no protein-DNA contact is maintained within the N-terminal tier upon DH-to-dCMGE conversion. As a result, the dimerization interface formed by the two N-terminal tiers within the DH changes register upon DH-to-dCMGE transition, through a 1-subunit rotation. It is this register shift in MCM that prevents any topological strain to accumulate within the

two MCM hexamers, while likely diffusing outside of the dCMGE complex. Our observation predicts that duplex DNA untwisting inside the MCM channel could occur in the context of one single CMGE complex. Biochemical work from the Bell and Gelles laboratories supports this notion<sup>62</sup>. In fact, an MCM variant that can be loaded onto DNA but not form a DH can support CMG formation and duplex DNA untwisting to wild type levels. The same variant however fails to support replication fork establishment, indicating that two symmetry related MCM hexamers are required to promote origin firing<sup>62,63</sup>. During this process, one strand is ejected from each CMG and becomes the translocation strand of the opposed CMG, in a process that causes the two helicases that cross paths<sup>1</sup>. Although this event is not understood at the molecular level, our discovery of the dCMGE intermediate that nucleates origin DNA melting invites a model for origin firing. In downstream events towards replication fork establishment, we speculate, unwinding of the intervening duplex DNA might require N-terminal interactions with duplex DNA to be maintained after dCMGE formation. Through the establishment of such N-terminal topological link, any new relative rotation of two separated dCMGE complexes would result in unwinding of the intervening duplex DNA. The lagging-strand engaging N-terminal Mcm6 wedge insertion, established upon dCMGE formation, could form this topological link. In a later step, replication forks are established upon dCMGE engagement by Mcm10, which triggers ATP hydrolysis by the CMG and lagging strand ejection, allowing the bypass of the two activated replicative helicases<sup>1</sup>. How Mcm10 functions during origin firing is not understood at the molecular level. Nucleoprotein transitions leading to origin activation are depicted in **Extended Data Fig. 8**.

## Supplementary References

62. Champasa, K., Blank, C., Friedman, L. J., Gelles, J. & Bell, S. P. A conserved Mcm4 motif is required for Mcm2-7 double-hexamers formation and origin DNA unwinding. *Elife* 8, e45538 (2019).
63. Langston, L. D. & O'Donnell, M. E. An explanation for origin unwinding in eukaryotes. *Elife* 8, e46515 (2019).

## Source Data

Figure 1d

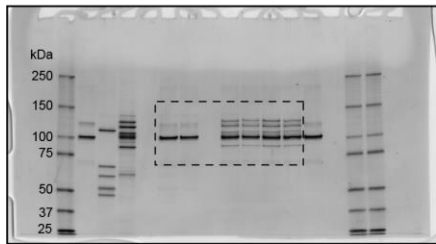

Figure 4d

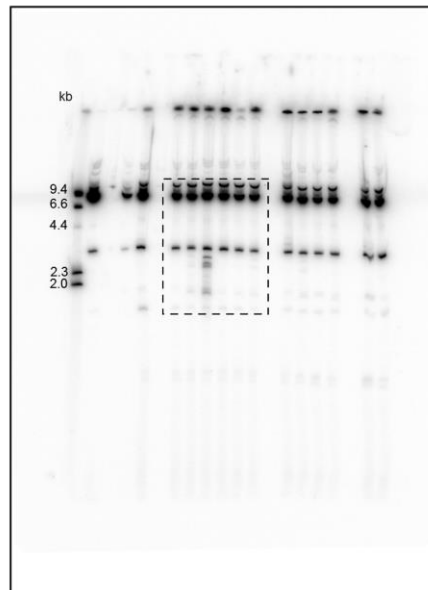

Figure 1e

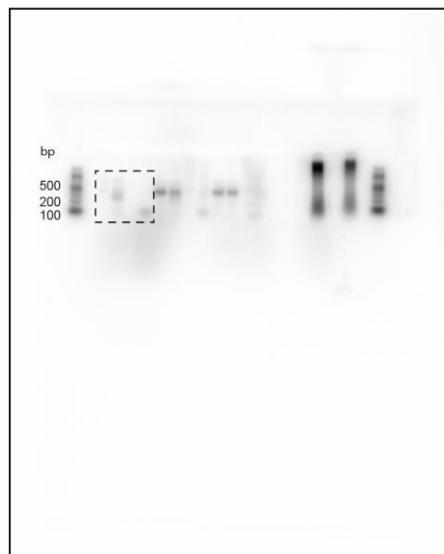

Extended data figure 1a

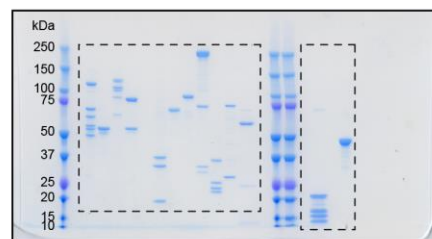

Figure 1f

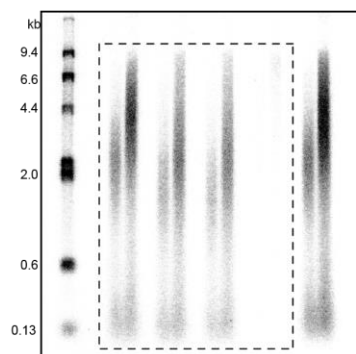

Extended data figure 1b

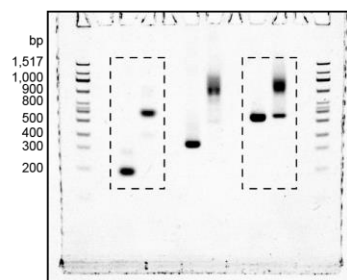

Extended data figure 1g

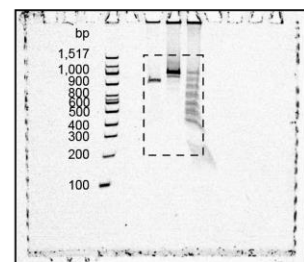

**Supplementary Figure 1:** Source images for all data obtained by electrophoretic separation in the Figures indicated.

**Supplementary Table 1: Oligonucleotides and gene blocks used in this study.**

| <b>Name</b> | <b>Usage</b>                                             | <b>Sequence</b>                                                                                                                          |
|-------------|----------------------------------------------------------|------------------------------------------------------------------------------------------------------------------------------------------|
| gbJL004     | Template for RFC for construction of pJL003              | ATGGGCAGCAGCTGGTCTCACCCCAATTTGAGA<br>AAGGCGGTGGCAGCGGCGGCTAGCGGAGGTGG<br>CAGCTGGTCCACACCACCAATTCGAGAAAGAAAAC<br>CTGTACTTCCAATCCATGGGTTAC |
| oJL009      | Forward primer for generation of pJL003                  | ATAATTTTGTTTAACTTTAAGAAGGAGATATAACC<br>AATGGGCAGCAGCTGGTCT                                                                               |
| oJL010      | Reverse primer for generation of pJL003                  | TCCCATCTGCTAGGACATCATCAATGTCATAGTA<br>ACCCATGGATTGGAAGTACAGG                                                                             |
| oJL020      | Forward primer for generation of nucleosome flanked ARS1 | CGATAGAACTCGGCGCCCTGGAGAATCGCGGT<br>GCCG                                                                                                 |
| DNACSR1     | Reverse primer for generation of nucleosome flanked ARS1 | CCTGCACCCCAGGGACTTGAAGTAATAAGGAC                                                                                                         |
| oJL019      | Forward primer for generation of 168bp M.HpaII ARS1      | ATATATCC*GGCCTGTATTTTACAGATTTTATGT<br>TTAGATCTTTTATGC                                                                                    |
| oJL040      | Reverse primer for generation of 168bp M.HpaII ARS1      | AGGGCGCC*GGAAGTGGGAAAATAGCAAATTTTCG<br>TCAAAAATGC                                                                                        |
| oSSH047     | Forward primer for generation of ARS1 copy 1             | GAATTGACGCGTATTGGGATTCAGCTCCGGATGG<br>TCCATTTTACAGATTTTATGTTT                                                                            |
| oSSH048     | Reverse primer for generation of ARS1 copy 1             | ACCCTCGTCCAGTTGAACGTTATTACTGAGTA<br>GTATTTATTTAAGTAT                                                                                     |
| oSSH049     | Forward primer for generation of ARS1 copy 2             | GTTCAACTGTGACGAGCGGTAGCAAAAAGGCCAGG<br>AACCGT                                                                                            |
| oSSH050     | Reverse primer for generation of ARS1 copy 2             | CCGCTGTTGGATATCTGATGTTATTACTGAGTA<br>GTATTT                                                                                              |
| oSSH051     | Forward primer for generation of ARS1 copy 3             | ATCAGATATCCAACAGGCGGAGCAAAAAGGCCAGG<br>AACCGT                                                                                            |
| oSSH052     | Reverse primer for generation of ARS1 copy 3             | TTCTGTAAGGATCCGTATTAGTTATTACTGAGTA<br>GTATTT                                                                                             |
| oSSH053     | Forward primer for generation of ARS1 copy 4             | TAATACGGATCCTTACAGAAAGCAAAAAGGCCAGG<br>AACCGT                                                                                            |
| oSSH054     | Reverse primer for generation of ARS1 copy 4             | TTTCCAAGCTTATCCCTGAGTTATTACTGAGTA<br>GTATTT                                                                                              |
| oSSH055     | Forward primer for generation of ARS1 copy 5             | TCAGGGGATAAGCTTGGAAAAGCAAAAAGGCCAGG<br>AACCGT                                                                                            |
| oSSH056     | Reverse primer for generation of ARS1 copy 5             | GGCCTTGAATTCACATGTTTCGTTATTACTGAGTA<br>GTATTT                                                                                            |
| oSSH057     | Forward primer for generation of ARS1 copy 6             | GAACATGTGAATTC AAGGCCAGCAAAAAGGCCAGG<br>AACCGT                                                                                           |



|         |                                                                                                    |                                                                                                                                                                                                                                                                                                                                                                                                                                                                                                                                                                                                                                                                                                                                                                                                                                                                                                                                                                                                                                                                                                                                                                                                                                                  |
|---------|----------------------------------------------------------------------------------------------------|--------------------------------------------------------------------------------------------------------------------------------------------------------------------------------------------------------------------------------------------------------------------------------------------------------------------------------------------------------------------------------------------------------------------------------------------------------------------------------------------------------------------------------------------------------------------------------------------------------------------------------------------------------------------------------------------------------------------------------------------------------------------------------------------------------------------------------------------------------------------------------------------------------------------------------------------------------------------------------------------------------------------------------------------------------------------------------------------------------------------------------------------------------------------------------------------------------------------------------------------------|
| oSSH063 | Reverse primer for generation of ARS1 copy 6                                                       | GCTCGGCGGCCATTGGGATTCAGCTCCGGATGG<br>TCCGTTATTACTGAGTAGTATTTATT                                                                                                                                                                                                                                                                                                                                                                                                                                                                                                                                                                                                                                                                                                                                                                                                                                                                                                                                                                                                                                                                                                                                                                                  |
| oSSH038 | Primer for amplification of M.HpaII array                                                          | TCAGCTCC*GGATGGTCC                                                                                                                                                                                                                                                                                                                                                                                                                                                                                                                                                                                                                                                                                                                                                                                                                                                                                                                                                                                                                                                                                                                                                                                                                               |
| oMG25   | Synthetic DNA fragment (geneart) used to generate pMG39 plasmid using MluI /XbaI restriction sites | ACGCGTCACTGGGGTGGTGACAAGAAGAACAGGA<br>GTCTTCCCTCAATTAAAAATATGTCAAATTCAATT<br>GTTTGAAATGTGGCTCCATTTTGGGCCCATTTTT<br>TCAAGATTCTAATGAAGAAATTAGAATCTCATT<br>TGTACAAACTGCAAATCAAAAGGTCCCTTTAGAG<br>TCAATGGAGAAAAACTGTGTACCGAAATTATCA<br>AAGGGTTACGCTCCAGGAAGCTCCCGAACCGTT<br>CCTCCAGGCCGTCTACCAAGACATAGAGAAGTCA<br>TTTTGTTGGCGGATTTGGTAGATGTATCCAAGCC<br>AGGTGAAGAGGTAGAAGTTACCGGCATCTACAAA<br>AATAACTACGATGGTAACTTGAATGCAAAGAACG<br>GATTCCCCGTTTTTGCACAATTATCGAGGCAAA<br>TTCTATAAAAAAGAAGAGAGGGCAATACAGCTAAC<br>GAAGGCGAAGAAGGGTTGGATGTTTTTCAGTTGGA<br>CTGAAGAAGAAGAACGTGAATTTAGAAAAGATTT<br>TAGGGATCGTGGTATAATTGATAAAATTATATCA<br>TCGATGGCACCGTCTATCTATGGTCATAGAGATA<br>TTAAAACGTCAGTCGCGTGCTCATTATTTGGAGG<br>TGTTCCAAAAAACGTCAATGGAAAACATTCTATT<br>CGTGGTGATATCAATGTGTTATTATTAGGTGATC<br>CAGGTACTGCCAAATCTCAAATCTTAAAAACGTT<br>CGAGAAAACAGCGCATAGAGCGGTCTTTGCAACT<br>GGTCAGGGTGCTTCGGCTGTCGGTCTGACAGCAT<br>CCGCTAGAGCAGATGCTATTACTGCAGAAGCGAC<br>CTTAGAAGGGGGGGCGCTAGTATTGGCTGATAAG<br>GGTGTGTTGTTAATTGATGAATTCGATAAGATGA<br>ACGATCAGGATCGTACATCTATTCATGAGGCTAT<br>GGAACAGCAAAGTATTTCCATTTCCGCGGCCGGT<br>ATTGTTACTACATTACAAGCGCGCTGCTCAATTA<br>TTGCTGCGGCAAAATCCTAATGGTGGTAGATATAA<br>TTCAACCTTGCCCTTTAGCTCAGAATGTTAGTTTG<br>ACCGAGCCTATTCTGTCTAGA |
| oMG27   | Synthetic DNA fragment (geneart) used to generate                                                  | CGTACGCTGGACGTCATTCTTCGAGGTGATAGTG<br>TCGAAAGAGCCAAGCCAGGTGACCGTTGCAAATT<br>TACGGGTGTGGAAATTGTAGTACCTGATGTTACA                                                                                                                                                                                                                                                                                                                                                                                                                                                                                                                                                                                                                                                                                                                                                                                                                                                                                                                                                                                                                                                                                                                                   |

---

|       |                                                                                                      |                                                                                                                                                                                                                                                                                      |
|-------|------------------------------------------------------------------------------------------------------|--------------------------------------------------------------------------------------------------------------------------------------------------------------------------------------------------------------------------------------------------------------------------------------|
|       | pMG43 using BsiWI/ SphI<br>restriction sites                                                         | CAATTGGGGCTACCAGGTGTGAAGCCAAGTTCAA<br>CATTAGATGAGGAGGGTATTTCGAAGACTACTGA<br>AGGTTTGAATAGTGGTGTACTGGTTTACGCTCT<br>CTTGGTGTTCGTGATTTGACATACAAGATTAGCT<br>TTCTGGCATGC                                                                                                                   |
| oMG28 | Synthetic DNA fragment<br>(geneart) used to generate<br>pMG44 using BsiWI/ SphI<br>restriction sites | CGTACGCTGGACGTCATTCTTCGAGGTGATAGTG<br>TCGAAAGAGCCAAGCCAGGTGACCGTTGCAAATT<br>TACGGGTGTGGAAATTGTAGTACCTGATGTTGAG<br>GAGGAGGAGGAGCCAGGTGTGAAGCCAAGTTCAA<br>CATTAGATACTAGAGGTATTTCGAAGACTACTGA<br>AGGTTTGAATAGTGGTGTACTGGTTTACGCTCT<br>CTTGGTGTTCGTGATTTGACATACAAGATTAGCT<br>TTCTGGCATGC |
| oMG17 | Primer to verify Mcm2 point<br>mutants by sequencing<br>(GeneWiz)                                    | AAGCTCTTCGCCTTCTCG                                                                                                                                                                                                                                                                   |
| oMG18 | Primer to verify Mcm2 point<br>mutants by sequencing<br>(GeneWiz)                                    | GGTAGATGTATCCAAGCCAG                                                                                                                                                                                                                                                                 |
| oMG21 | Primer to to verify Mcm5 point<br>mutants by sequencing<br>(GeneWiz)                                 | GCAAACGAGTCGAATATTGGTG                                                                                                                                                                                                                                                               |
| oMG22 | Primer to to verify Mcm5 point<br>mutants by sequencing<br>(GeneWiz)                                 | GTGACGAAGTTCGATGACAG                                                                                                                                                                                                                                                                 |
| oMG23 | Primer to to verify Mcm6 point<br>mutants by sequencing<br>(GeneWiz)                                 | CGAGCATCTGAAGCAAGATAC                                                                                                                                                                                                                                                                |
| oMG24 | Primer to to verify Mcm6 point<br>mutants by sequencing<br>(GeneWiz)                                 | GTGACAAGAACATCTGAGGTC                                                                                                                                                                                                                                                                |

---

\* denotes 5-Fluoro-2'-deoxycytidine

**Supplementary Table 2: Recombinant DNA reagents used in this study.**

| <b>Plasmid</b> | <b>Designation/characteristics</b>                                                                          | <b>Selection</b> | <b>Reference</b>             |
|----------------|-------------------------------------------------------------------------------------------------------------|------------------|------------------------------|
| pAM3           | Cdc6 purification                                                                                           | Amp              | Frigola et al., 2013         |
| pJL003         | GINS purification (used in EM assays)                                                                       | Kan              | This study                   |
| pFJD5          | GINS purification (used for unwinding assay and DNA replication assays)                                     | Kan              | Gambus et al., 2009          |
| pGC441         | Sld2 purification                                                                                           | Amp              | Posse et al., 2021           |
| pMD132         | Mcm10 purification                                                                                          | Kan              | Douglas et al., 2018         |
| pJL004         | M.HpaII purification                                                                                        | Amp              | This study                   |
| pTM011         | H2A/H2B                                                                                                     | Amp              | Saravanan et al., 2012       |
| pTM004         | H3/H4                                                                                                       | Spec             | This study                   |
| pTM005         | Nucleosome flanked ARS1 origin                                                                              | Amp              | Miller et al., 2019          |
| pSSH005        | 6x ARS1 array                                                                                               | Amp              | This study                   |
| pBS/ARS1WTA    | 3.2-kb plasmid containing ARS1(used for 616 bp DNA preparation for unwinding assay)                         | Amp              | Marahrens and Stillman, 1992 |
| pJY22          | 10.6 kb plasmid DNA with ARS1 (used for DNA replication assay)                                              | Amp              | Yeeles et al., 2017          |
| pJF3           | pRS304/Mcm4/Mcm5                                                                                            | Amp<br>Trp1      | Frigola et al., 2013         |
| pJF4           | pRS305/Mcm6/Mcm7                                                                                            | Amp<br>Leu2      | Frigola et al., 2013         |
| pAM38          | pRS306/Mcm2_CBP-TEV-Mcm3                                                                                    | Amp<br>Ura3      | Coster et al., 2014          |
| pMG39          | pMA vector (GeneArt) containing oMG25 between MluI /XbaI restriction sites (used to generate pMG69 plasmid) | Amp              | This study/ GeneArt          |
| pMG41          | pMA vector (GeneArt) containing oMG26 between BstBI/ NsiI restriction sites                                 | Amp              | This study/ GeneArt          |

---

|       |                                                                                                              |             |                     |
|-------|--------------------------------------------------------------------------------------------------------------|-------------|---------------------|
|       | (used to generate pMG52 plasmid)                                                                             |             |                     |
| pMG43 | pMA vector (GeneArt) containing oMG27 between BsiWI/ SphI restriction sites (used to generate pMG53 plasmid) | Amp         | This study/ GeneArt |
| pMG44 | pMA vector (GeneArt) containing oMG28 between BsiWI/ SphI restriction sites (used to generate pMG54 plasmid) | Amp         | This study/ GeneArt |
| pMG69 | pRS306/Mcm2 6A, CBP-TEV Mcm3 (used to generate yeast strain for Mcm2 6A mutant purification)                 | Amp<br>Ura3 | This study          |
| pMG53 | pRS305/Mcm6 2E, Mcm7 (used to generate yeast strain for Mcm6 2E mutant purification)                         | Amp<br>Leu2 | This study          |
| pMG54 | pRS305/Mcm6 5E, Mcm7 (used to generate yeast strain for Mcm6 5E mutant purification)                         | Amp<br>Leu2 | This study          |

---

**Supplementary Table 3: *Saccharomyces cerevisiae* strains used in this study.**

| <b>Strain</b> | <b>Genotype</b>                                                                                                                                                                                                                                                             | <b>Designation</b>          | <b>Reference</b>     |
|---------------|-----------------------------------------------------------------------------------------------------------------------------------------------------------------------------------------------------------------------------------------------------------------------------|-----------------------------|----------------------|
| ySD-<br>ORC   | <i>MATa ade2-1 ura3-1 his3-11,15 trp1-1 leu2-3,112</i><br><i>can1-100</i><br><i>bar1::Hyg</i><br><i>pep4::KanMX</i><br><i>his3::HIS3pRS303/ORC3, ORC4</i><br><i>trp1::TRP1pRS304/ORC5, ORC6</i><br><i>ura3::URA3pRS306/CBP-ORC1, ORC2</i>                                   | ORC<br>purification         | Frigola et al., 2013 |
| yAM33         | <i>MATa ade2-1 ura3-1 his3-11,15 trp1-1 leu2-3,112</i><br><i>can1-100</i><br><i>bar1::Hyg</i><br><i>pep4::KanMX</i><br><i>his3::HIS3pRS303/CDT1,GAL4</i><br><i>trp1::TRP1pRS304/MCM4,MCM5</i><br><i>leu2::LEU2pRS305/MCM6 MCM7</i><br><i>ura3::URA3pRS306/MCM2,CBP-MCM3</i> | Mcm2–7/Cdt1<br>purification | Coster et al., 2014  |
| ySDK8         | <i>MATa ade2-1 ura3-1 his3-11,15 trp1-1 leu2,3,112</i><br><i>can1-100,</i><br><i>bar1::Hyg</i><br><i>Pep4::KanMX</i><br><i>trp1::TRP1pRS304/CDC7, CBP-DBF4</i>                                                                                                              | DDK<br>purification         | On et al., 2014      |
| yAE88         | <i>MATa ade2-1 ura3-1 his3-11,15 trp1-1 leu2-3,112</i><br><i>can1-100</i><br><i>bar1::Hyg</i><br><i>pep4::KanMX</i><br><i>his3::HIS3pRS303/CBP-TEV-CLB5(D1-100), GAL4</i><br><i>ura3::URA3pRS306/CKS1, CDC28</i>                                                            | CDK<br>purification         | Hill et al., 2020    |
| yJY13         | <i>MATa ade2-1 ura3-1 his3-11,15 trp1-1 leu2-3,112</i><br><i>can1-100</i><br><i>bar1::Hyg</i><br><i>pep4::KanMX</i><br><i>his3::HIS3pRS303/Cdc45iflag2, GAL4</i>                                                                                                            | Cdc45<br>purification       | Yeeles et al., 2015  |
| yJY26         | <i>MATa ade2-1 ura3-1 his3-11,15 trp1-1 leu2-3,112</i><br><i>can1-100</i><br><i>bar1::Hyg</i><br><i>pep4::KanMX</i>                                                                                                                                                         | Dpb11<br>purification       | Yeeles et al., 2015  |

---

|       |                                                                                                                                                                                                          |                                     |                         |
|-------|----------------------------------------------------------------------------------------------------------------------------------------------------------------------------------------------------------|-------------------------------------|-------------------------|
|       | <i>his3::HIS3pRS303/Dpb11-3xflag (Nat-NT2), GAL4</i>                                                                                                                                                     |                                     |                         |
| yAJ2  | <i>MATa ade2-1 ura3-1 his3-11,15 trp1-1 leu2-3,112<br/>can1-100<br/>bar1::Hyg<br/>pep4::KanMX<br/>ura3::URA3pRS306/Dpb2, Dpb3<br/>trp1::TRP1pRS304/Pol2, Dpb4-Tev-CBP</i>                                | Pol epsilon<br>purification         | Yeeles et al., 2015     |
| yAE99 | <i>MATa ade2-1 ura3-1 his3-11,15 trp1-1 leu2-3,112<br/>can1-100<br/>bar1::Hyg<br/>pep4::KanMX<br/>ura3::URA3-Gal1-10 Dpb2 + Dpb3<br/>Pol2::Pol2-FLAG-NAT<br/>trp1::TRP1-Gal1-10 Pol2 exo- + Dpb4-CBP</i> | Pol epsilon<br>exo-<br>purification | Goswami et al.,<br>2018 |
| yTD6  | <i>MATa ade2-1 ura3-1 his3-11,15 trp1-1 leu2-3,112<br/>can1-100,<br/>bar1::Hyg<br/>pep4::KanMX,<br/>his3::HIS3pRS303/SLD3-TCP, GAL4,<br/>leu2::LEU2pRS305/SLD7</i>                                       | Sld3–7<br>purification              | Yeeles et al., 2015     |
| yAE95 | <i>MATa ade2-1 ura3-1 his3-11,15 trp1-1 leu2-3,112<br/>can1-100,<br/>bar1::Hyg<br/>pep4::KanMX,<br/>trp1::TRP1pRS304/POL1, POL12,<br/>ura3::URA3pRS306/CBP-TEV-PRI1, PRI2</i>                            | Pol alpha<br>purification           | Hill et al., 2020       |
| yAE42 | <i>MATa ade2-1 ura3-1 his3-11,15 trp1-1 leu2-3,112<br/>can1-100<br/>bar1::Hyg<br/>pep4::KanMX<br/>his3::HIS3pRS303/CBP-TOP1+Gal4</i>                                                                     | TopoI<br>purification               | Yeeles et al., 2017     |
| yAE31 | <i>MATa ade2-1 ura3-1 his3-11,15 trp1-1 leu2-3,112<br/>can1-100<br/>bar1::Hyg<br/>pep4::KanMX<br/>his3::HIS3pRS303/CBP-TEV-RFA1, GAL4,<br/>ura3::URA3pRS306/RFA2, RFA3</i>                               | RPA<br>purification                 | Yeeles et al., 2015     |

---

|        |                                                                                                                                                                                                                                                                                      |                             |                      |
|--------|--------------------------------------------------------------------------------------------------------------------------------------------------------------------------------------------------------------------------------------------------------------------------------------|-----------------------------|----------------------|
| yJF21  | <i>MATa ade2-1 ura3-1 his3-11,15 trp1-1 leu2-3,112</i><br><i>can1-100</i><br><i>bar1::Hyg</i><br><i>pep4::KanMX</i><br><i>his3::HIS3pRS303/Cdt1,Gal4</i><br><i>trp1::TRP1pRS304Mcm4, Mcm5</i><br><i>leu2::LEU2pRS305/Mcm6, Mcm7</i>                                                  | Background strain           | Frigola et al., 2013 |
| yAM21  | <i>MATa ade2-1 ura3-1 his3-11,15 trp1-1 leu2-3,112</i><br><i>can1-100</i><br><i>bar1::Hyg</i><br><i>pep4::KanMX</i><br><i>his3::HIS3pRS303/Cdt1,Gal4</i><br><i>ura3::URA3pRS306/Mcm2, CBP-TEV Mcm3</i><br><i>leu2::LEU2pRS305/Mcm6, Mcm7</i>                                         | Background strain           | Coster et al., 2014  |
| yAM20  | <i>MATa ade2-1 ura3-1 his3-11,15 trp1-1 leu2-3,112</i><br><i>can1-100</i><br><i>bar1::Hyg</i><br><i>pep4::KanMX</i><br><i>trp1::TRP1pRS304Mcm4, Mcm5</i><br><i>ura3::URA3pRS306/Mcm2, CBP-TEV Mcm3</i><br><i>his3::HIS3pRS303/Cdt1,Gal4</i>                                          | Background strain           | Coster et al., 2014  |
| yAE160 | <i>MATa ade2-1 ura3-1 his3-11,15 trp1-1 leu2-3,112</i><br><i>can1-100</i><br><i>bar1::Hyg</i><br><i>pep4::KanMX</i><br><i>trp1::TRP1pRS304Mcm4, Mcm5</i><br><i>ura3::URA3pRS306/Mcm2, CBP-TEV Mcm3</i><br><i>his3::HIS3pRS303/Cdt1,Gal4</i><br><i>leu2::LEU2pRS305/Mcm6 2E, Mcm7</i> | Mcm6 2E mutant purification | This study           |
| yAE161 | <i>MATa ade2-1 ura3-1 his3-11,15 trp1-1 leu2-3,112</i><br><i>can1-100</i><br><i>bar1::Hyg</i><br><i>pep4::KanMX</i><br><i>trp1::TRP1pRS304Mcm4, Mcm5</i><br><i>ura3::URA3pRS306/Mcm2, CBP-TEV Mcm3</i><br><i>his3::HIS3pRS303/Cdt1,Gal4</i><br><i>leu2::LEU2pRS305/Mcm6 5E, Mcm7</i> | Mcm6 5E mutant purification | This study           |

---

|        |                                                        |              |            |
|--------|--------------------------------------------------------|--------------|------------|
| yAE164 | <i>MATa ade2-1 ura3-1 his3-11,15 trp1-1 leu2-3,112</i> | Mcm2 6A      | This study |
|        | <i>can1-100</i>                                        | mutant (Mcm2 |            |
|        | <i>bar1::Hyg</i>                                       | V580A/       |            |
|        | <i>pep4::KanMX</i>                                     | K582A/       |            |
|        | <i>his3::HIS3pRS303/Cdt1, Gal4</i>                     | P584A/       |            |
|        | <i>trp1::TRP1pRS304/Mcm4, Mcm5</i>                     | K587A/       |            |
|        | <i>leu2::LEU2pRS305/Mcm6, Mcm7</i>                     | W589A/       |            |
|        | <i>ura3::URA3pRS306/Mcm2 6A, CBP-TEV Mcm3</i>          | K633A)       |            |
|        |                                                        | purification |            |

---



**Supplementary Video 1:** Cryo-EM density of the yeast CMGE dimer caught in the act of nucleating origin DNA melting.

**Supplementary Video 2:** Animation of DH to dCMGE conversion. The molecular morph shows a register shift in the subunit contacts at the MCM dimerization interface. dCMGE formation involves the disruption of an inter-ring Mcm7–Mcm5 contact that reveals a GINS-engagement site on Mcm5. dCMGE formation also involves the formation of a splayed MCM dimer that is kept together by a new Mcm6 dimer interface and by duplex DNA (shown in green). This DNA becomes exposed in between the two helicase rings when dCMGE is formed. Whether the DH to dCMGE transition is symmetric or conformational changes occur sequentially within the two rings remains an open question.

**Supplementary Video 3:** DH to dCMGE transition involves a change in nucleotide occupancy, which in turn promotes a change in DNA engagement.

**Supplementary Video 4:** DH to dCMGE transition involves a change in Mcm2 ATPase binding to DNA. While in DH only residue K587 of the h2i pore loop contacts DNA, six pore loop residues engage untwisted DNA in the dCMGE, including four new h2i and one new PS1BH pore loop contacts.

**Supplementary Video 5:** Mechanism coupling DNA melting and DH separation. DH to dCMGE transition involves the reconfiguration of the Mcm6 wedge insertion. This element moves from the MCM dimerization interface in DH to the inner lumen of the MCM ring in the dCMGE. In doing so, the Mcm6 wedge insertion stabilizes three lagging strand orphan bases that become exposed upon DNA untwisting. Mcm6 residues T423 and R424 move from the outer surface of the MCM ring in the DH to the inner lumen of dCMGE and engage in orphan base stabilization. The structural change in the DNA is first shown in the context of a single MCM hexamer and then across the entire double hexamer.
